# Supplementary material for: Supramolecular interaction of inositol phosphates with Cu(ii): comparative study of InsP6–InsP3
Source: Royal Society of Chemistry journal article supplement (doi:10.1039/d1ce01733k), 2022-01-01
Supplement: d1ce01733k1.pdf [file d1ce01733k1.pdf]

## Electronic Supplementary Information

### Supramolecular interaction of inositol phosphates with Cu(II): comparative study $\text{InsP}_6$ - $\text{InsP}_3$

Delfina Quiñone, Nicolás Veiga, Matteo Savastano, Julia Torres, Antonio Bianchi, Carlos Kremer and  
Carla Bazzicalupi

#### Content

|                                                                                                                                                                                                                         |     |
|-------------------------------------------------------------------------------------------------------------------------------------------------------------------------------------------------------------------------|-----|
| Table S1. Crystal data and refinement parameters for $\mathbf{1}\cdot\mathbf{14}\text{H}_2\text{O}$ and $\mathbf{2}\cdot\mathbf{10.5}\text{H}_2\text{O}$ . .....                                                        | S2  |
| Table S2. Bond distances and angles for metal coordination environments in $\mathbf{1}\cdot\mathbf{14}\text{H}_2\text{O}$ . .....                                                                                       | S3  |
| Table S3. Bond distances and angles for metal coordination environments in $\mathbf{2}\cdot\mathbf{10.5}\text{H}_2\text{O}$ . .....                                                                                     | S3  |
| Table S4. PDB Identifiers and respective chemical names. ....                                                                                                                                                           | S4  |
| Fig. S1. Species distribution diagram for phen: $\text{L}^1$ :Cu(II). .....                                                                                                                                             | S5  |
| Fig. S2. Experimental IR spectra of complexes $\mathbf{1}\cdot\mathbf{14}\text{H}_2\text{O}$ and $[\text{Cu}_5(\text{H}_7\text{L}^1)_2(\text{H}_2\text{O})_2(\text{phen})_5]\cdot\mathbf{23}\text{H}_2\text{O}$ . ..... | S6  |
| Fig. S3. Experimental and theoretical IR spectra of complex $\mathbf{2}$ . .....                                                                                                                                        | S7  |
| Fig. S4. Experimental IR spectra of compound $\mathbf{2}\cdot\mathbf{10.5}\text{H}_2\text{O}$ , terpy and sodium salt of $\text{L}^2$ . .....                                                                           | S8  |
| Fig. S5. DFT-optimized geometry in gas phase of $\mathbf{2}$ . .....                                                                                                                                                    | S9  |
| Fig. S6. Unique PDB structures containing $\text{InsP}$ isomers (1-6 phosphate groups). .....                                                                                                                           | S10 |
| Fig. S7. Distribution of available literature material by number of phosphate substituents (1-6) on the inositol core. ....                                                                                             | S11 |
| Fig. S8. Experimental metal by metal binding chance as percent of coordinated vs structure containing both the metal and $\text{InsPs}$ . .....                                                                         | S12 |
| Fig. S9. Overlook on metal complexes features: ligand denticity, metal complex nuclearity, participations of metal-coordinated water molecules in H-bond with phosphate groups of the ligand. ....                      | S13 |

**Table S1.** Crystal data and refinement parameters for **1**·14 H<sub>2</sub>O and **2**·10.5H<sub>2</sub>O.

|                                                 | <b>1</b> ·14 H <sub>2</sub> O                                                                  | <b>2</b> ·10.5H <sub>2</sub> O                                                                  |
|-------------------------------------------------|------------------------------------------------------------------------------------------------|-------------------------------------------------------------------------------------------------|
| Empirical formula                               | C <sub>66</sub> H <sub>82</sub> Cu <sub>3</sub> N <sub>10</sub> O <sub>39</sub> P <sub>6</sub> | C <sub>36</sub> H <sub>56</sub> Cu <sub>2</sub> N <sub>6</sub> O <sub>26.5</sub> P <sub>3</sub> |
| Formula weight                                  | 2015.85                                                                                        | 1216.85                                                                                         |
| Temperature (K)                                 | 298                                                                                            | 100                                                                                             |
| space group                                     | <i>P2<sub>1</sub>/c</i>                                                                        | <i>P-1</i>                                                                                      |
| <i>a</i> (Å)                                    | 10.5277(4)                                                                                     | 14.6359(5)                                                                                      |
| <i>b</i> (Å)                                    | 30.222(1)                                                                                      | 14.6677(5)                                                                                      |
| <i>c</i> (Å)                                    | 26.182(1)                                                                                      | 15.1995(8)                                                                                      |
| $\alpha$ (°)                                    | 90                                                                                             | 63.897(4)                                                                                       |
| $\beta$ (°)                                     | 100.361(4)                                                                                     | 64.765(4)                                                                                       |
| $\gamma$ (°)                                    | 90                                                                                             | 65.067(4)                                                                                       |
| Volume (Å <sup>3</sup> )                        | 8194.3(6)                                                                                      | 2538.2(2)                                                                                       |
| Z                                               | 4                                                                                              | 2                                                                                               |
| Independent reflections / R(int)                | 22869 / 0.0540                                                                                 | 8712 / 0.0752                                                                                   |
| $\mu$ (mm <sup>-1</sup> )                       | 0.990 (Mo-K $\alpha$ )                                                                         | 2.754 (Cu-K $\alpha$ )                                                                          |
| R indices [ <i>I</i> >2 $\sigma$ ( <i>I</i> )]* | R1= 0.0844<br>wR2= 0.1999                                                                      | R1= 0.0799<br>wR2= 0.2054                                                                       |
| R indices (all data)*                           | R1= 0.1188<br>wR2= 0.2205                                                                      | R1= 0.1113<br>wR2= 0.2659                                                                       |
| CCDC no.                                        | 2129733                                                                                        | 2129734                                                                                         |

\*  $R1 = \frac{\sum ||F_o| - |F_c||}{\sum |F_o|}$  ;  $wR2 = \frac{[\sum w(F_o^2 - F_c^2)^2 / \sum wF_o^4]}{2}$

**Table S2.** Bond distances (Å) and angles (deg) for metal coordination environments in **1-14** H<sub>2</sub>O.

|                |          |                 |          |                 |          |
|----------------|----------|-----------------|----------|-----------------|----------|
| Cu1 - N1       | 2.168(4) | Cu2 - N5        | 2.021(4) | Cu3 - N7        | 1.993(4) |
| Cu1 - N2       | 1.979(4) | Cu2 - N6        | 2.011(4) | Cu3 - N8        | 2.060(4) |
| Cu1 - N4       | 2.061(5) | Cu2 - O53       | 1.928(3) | Cu3 - N9        | 2.003(4) |
| Cu1 - N3       | 1.985(4) | Cu2 - O63       | 1.935(3) | Cu3 - N10       | 2.162(4) |
| Cu1 - O54      | 1.988(3) | Cu2 - OW1       | 2.328(4) | Cu3 - O43       | 1.958(3) |
|                |          |                 |          |                 |          |
| N1 - Cu1 - N2  | 80.5(2)  | N5 - Cu2 - N6   | 81.4(2)  | N7 - Cu3 - N8   | 81.9(2)  |
| N1 - Cu1 - N4  | 118.0(2) | N5 - Cu2 - O53  | 167.8(2) | N7 - Cu3 - N9   | 174.0(2) |
| N1 - Cu1 - N3  | 94.0(2)  | N5 - Cu2 - O63  | 90.9(2)  | N7 - Cu3 - N10  | 99.2(2)  |
| N1 - Cu1 - O54 | 101.8(2) | N5 - Cu2 - OW1  | 102.1(2) | N7 - Cu3 - O43  | 93.8(2)  |
| N2 - Cu1 - N4  | 97.4(2)  | N6 - Cu2 - O53  | 89.4(2)  | N8 - Cu3 - N9   | 92.4(2)  |
| N2 - Cu1 - N3  | 173.2(2) | N6 - Cu2 - O63  | 169.2(2) | N8 - Cu3 - N10  | 103.6(2) |
| N2 - Cu1 - O54 | 88.2(2)  | N6 - Cu2 - OW1  | 93.1(2)  | N8 - Cu3 - O43  | 155.1(2) |
| N4 - Cu1 - N3  | 81.7(2)  | O53 - Cu2 - O63 | 97.1(2)  | N9 - Cu3 - N10  | 80.2(2)  |
| N4 - Cu1 - O54 | 140.2(2) | O53 - Cu2 - OW1 | 86.3(1)  | N9 - Cu3 - O43  | 92.2(2)  |
| N3 - Cu1 - O54 | 96.7(2)  | O63 - Cu2 - OW1 | 95.9(1)  | N10 - Cu3 - O43 | 101.3(2) |

**Table S3.** Bond distances (Å) and angles (deg) for metal coordination environments in **2-10.5H<sub>2</sub>O**.

|                 |          |                 |          |
|-----------------|----------|-----------------|----------|
| Cu1 - N1        | 2.044(5) | Cu2 - N4        | 2.034(5) |
| Cu1 - N2        | 1.964(8) | Cu2 - N5        | 1.938(7) |
| Cu1 - N3        | 2.052(5) | Cu2 - N6        | 2.028(6) |
| Cu1 - O24       | 1.926(5) | Cu2 - OW1       | 1.944(7) |
| Cu1 - O34       | 2.184(5) | Cu2 - O14       | 2.145(5) |
|                 |          |                 |          |
| O24 - Cu1 - O34 | 98.8(2)  | O14 - Cu2 - N4  | 99.4(2)  |
| O24 - Cu1 - N1  | 95.5(2)  | O14 - Cu2 - N5  | 92.7(2)  |
| O24 - Cu1 - N2  | 162.0(2) | O14 - Cu2 - N6  | 92.6(2)  |
| O24 - Cu1 - N3  | 103.4(2) | O14 - Cu2 - OW1 | 101.4(2) |
| O34 - Cu1 - N1  | 89.7(2)  | N4 - Cu2 - N5   | 81.0(2)  |
| O34 - Cu1 - N2  | 98.2(2)  | N4 - Cu2 - N6   | 157.4(3) |
| O34 - Cu1 - N3  | 98.6(2)  | N4 - Cu2 - OW1  | 99.3(2)  |
| N1 - Cu1 - N2   | 79.1(3)  | N5 - Cu2 - N6   | 79.3(3)  |
| N1 - Cu1 - N3   | 157.8(2) | N5 - Cu2 - OW1  | 165.6(3) |
| N2 - Cu1 - N3   | 79.3(2)  | N6 - Cu2 - OW1  | 97.0(3)  |

**Table S4.** PDB Identifiers and respective chemical names.

| <i>Identifier</i>         | <i>Name</i>                                           |
|---------------------------|-------------------------------------------------------|
| <i>Monophosphates</i>     |                                                       |
| <b>I4D</b>                | D- <i>myo</i> -Inositol-4-Phosphate                   |
| <b>IPD</b>                | D- <i>myo</i> -Inositol-1-Phosphate                   |
| <b>LIP</b>                | L- <i>myo</i> -Inositol-1-Phosphate                   |
| <i>Bisphosphates</i>      |                                                       |
| <b>2IP</b>                | D- <i>myo</i> -Inositol-1,4-Bisphosphate              |
| <b>IP2</b>                | D- <i>myo</i> -Inositol-4,5-Bisphosphate              |
| <b>ITP</b>                | Inositol 1,3-Bisphosphate                             |
| <i>Trisphosphates</i>     |                                                       |
| <b>FGV</b>                | D- <i>myo</i> -Inositol-1,3,5-Trisphosphate           |
| <b>I2P</b>                | D- <i>myo</i> -Inositol-2,4,5-Trisphosphate           |
| <b>I3P</b>                | D- <i>myo</i> -Inositol-1,4,5-Trisphosphate           |
| <b>I3S</b>                | (1S,3S,4S)-1,3,4-Triphospho- <i>Myo</i> -Inositol     |
| <i>Tetrakisphosphates</i> |                                                       |
| <b>4IP</b>                | Inositol-(1,3,4,5)-Tetrakisphosphate                  |
| <b>4MY</b>                | <i>myo</i> -Inositol 3,4,5,6 Tetrakisphosphate        |
| <b>I0P</b>                | D- <i>myo</i> -Inositol 1,4,5,6 Tetrakisphosphate     |
| <b>I4P</b>                | (1S,3R,4R,6S)-1,3,4,6-Tetrapkisphosphate              |
| <i>Pentakisphosphates</i> |                                                       |
| <b>5IP</b>                | D- <i>myo</i> -Inositol(1,2,3,5,6)-Pentakisphosphate  |
| <b>5MY</b>                | <i>myo</i> -Inositol-(1,3,4,5,6)-Pentakisphosphate    |
| <b>I5P</b>                | Inositol-(1,3,4,5,6)-Pentakisphosphate                |
| <b>IP5</b>                | D- <i>myo</i> -Inositol-(1,2,3,4,5)-Pentakisphosphate |
| <b>K7V</b>                | <i>Neo</i> -Inositol Pentakisphosphate                |
| <i>Hexakisphosphates</i>  |                                                       |
| <b>IHP</b>                | Inositol Hexakisphosphate                             |
| <b>KGN</b>                | D- <i>Chiro</i> Inositol Hexakisphosphate             |

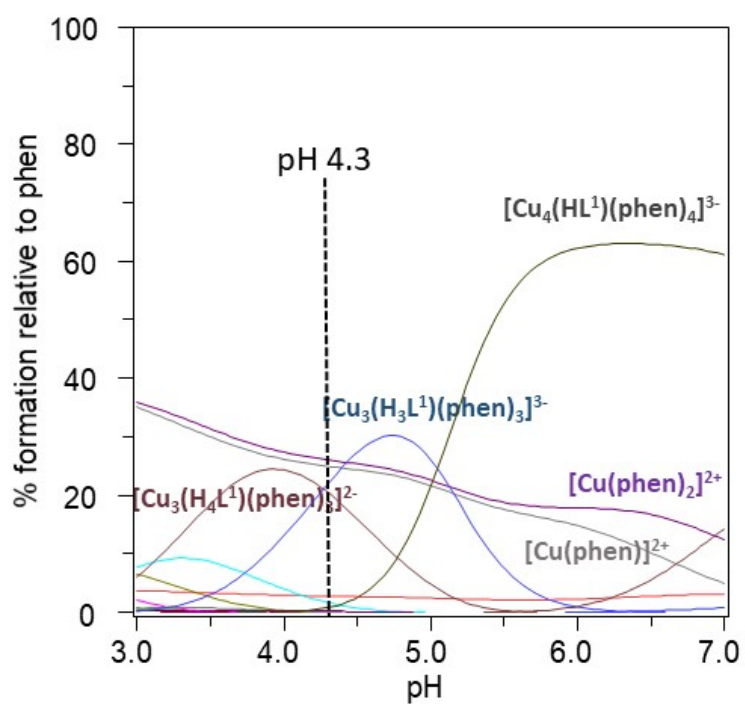

**Fig. S1.** Species distribution diagram for phen:L<sup>1</sup>:Cu(II) system (in terms of phen percentage), in 0.15 M Me<sub>4</sub>NCl at 37.0 °C from thermodynamic studies reported in [29]. Concentration of reactants follows those of the synthesis, [phen] = [Cu(II)] = 5 mM, [L<sup>1</sup>] = 0.8 mM. The vertical dashed line represents the pH of synthesis.

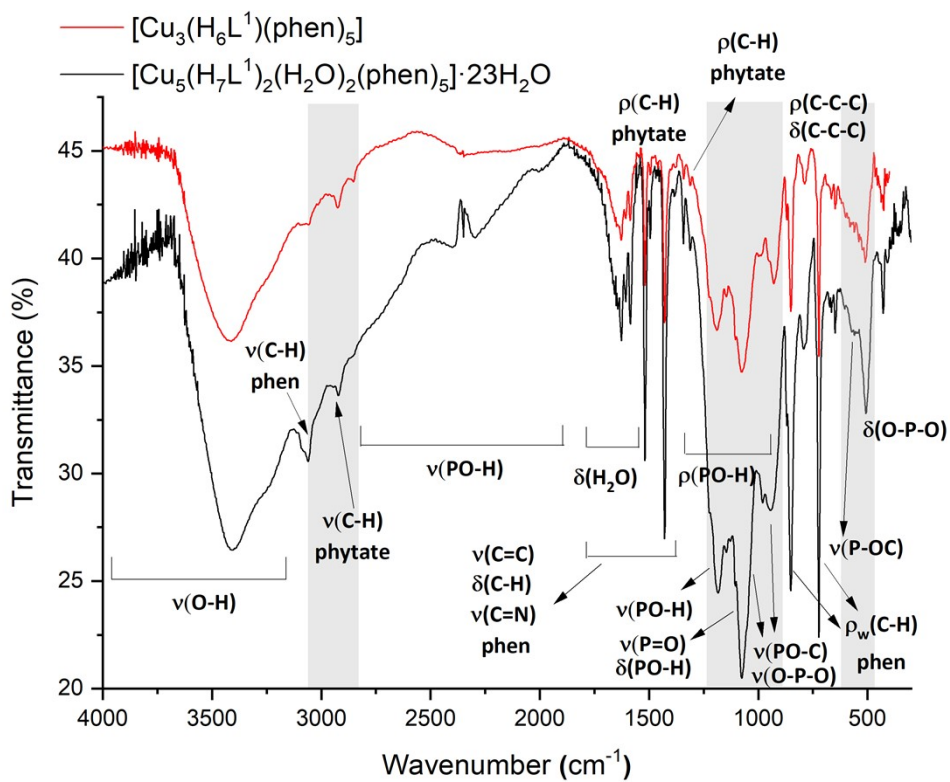

**Fig. S2.** Experimental IR spectra of complexes  $1 \cdot 14\text{H}_2\text{O}$  and  $[\text{Cu}_5(\text{H}_7\text{L}^1)_2(\text{H}_2\text{O})_2(\text{phen})_5] \cdot 23\text{H}_2\text{O}$  [29]. Grey zones highlight the slight differences between both spectra.

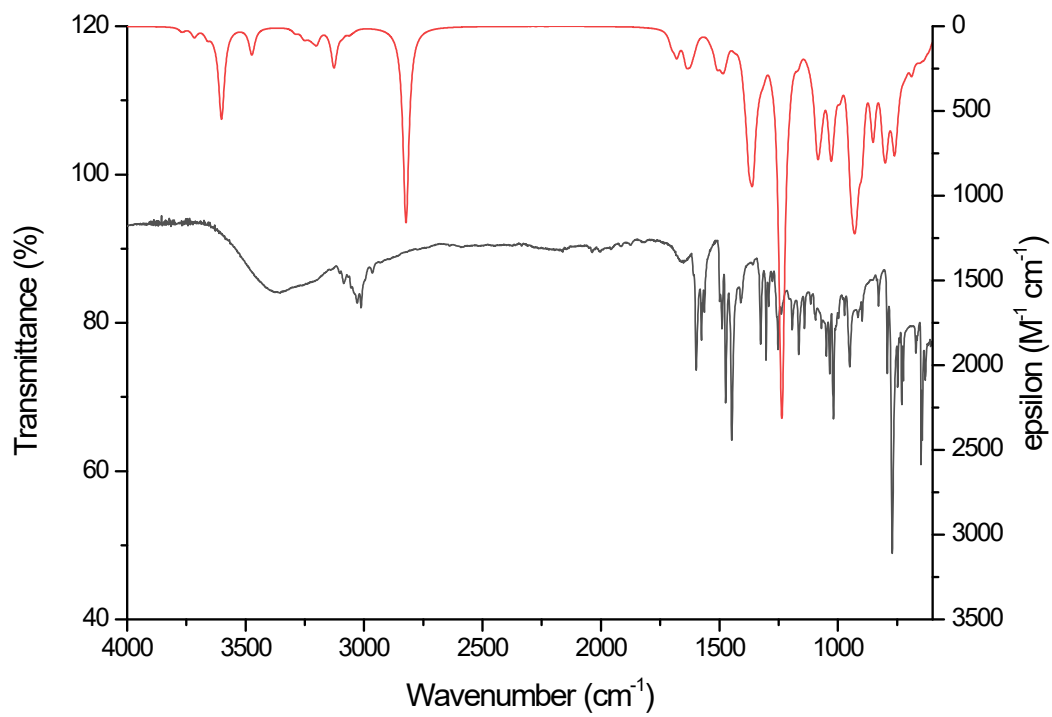

**Fig. S3.** Experimental (black) and theoretical (red) IR spectra of complex **2**.

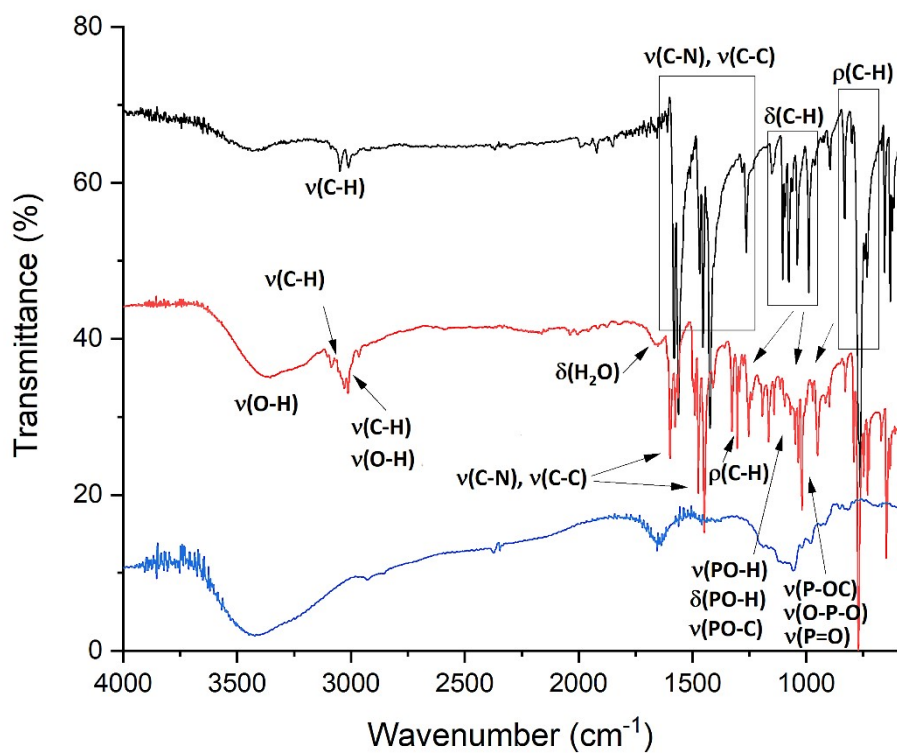

**Fig. S4.** Experimental IR spectra of compound **2**·10.5H<sub>2</sub>O (red) and the ligands terpy (black) and sodium salt of L<sup>2</sup> (blue).



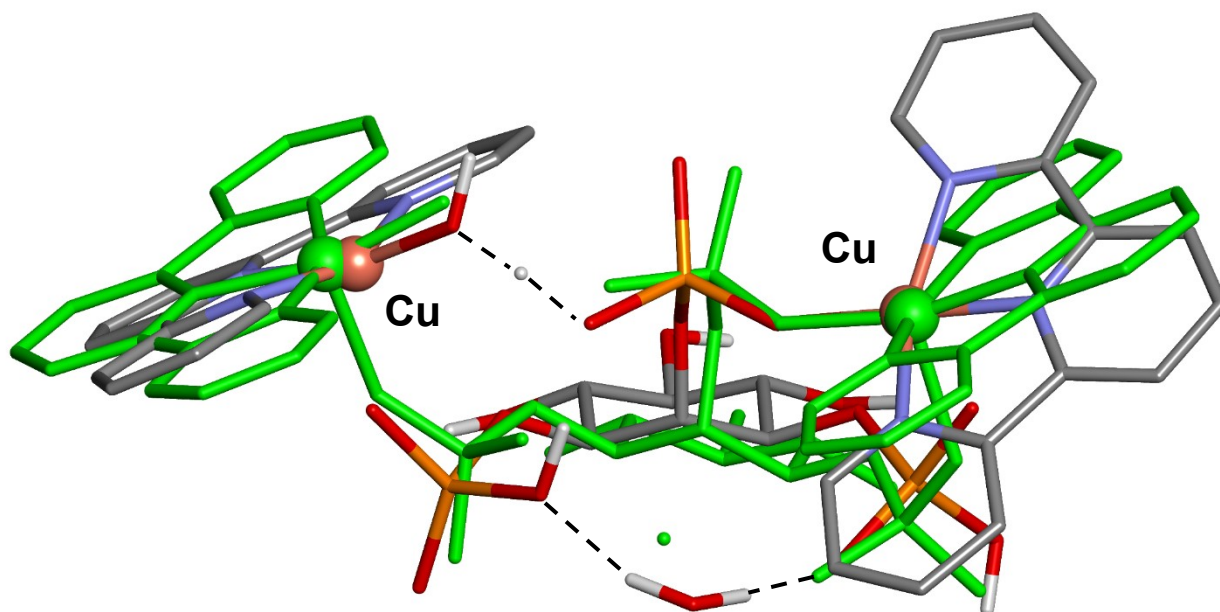

**Fig. S5.** DFT-optimized geometry in gas phase of **2**. Atom colour code: C (grey), O (red), N (blue), P (orange), Cu (pink). The corresponding crystal structure is shown superimposed in green. Non-polar hydrogen atoms are omitted for clarity.

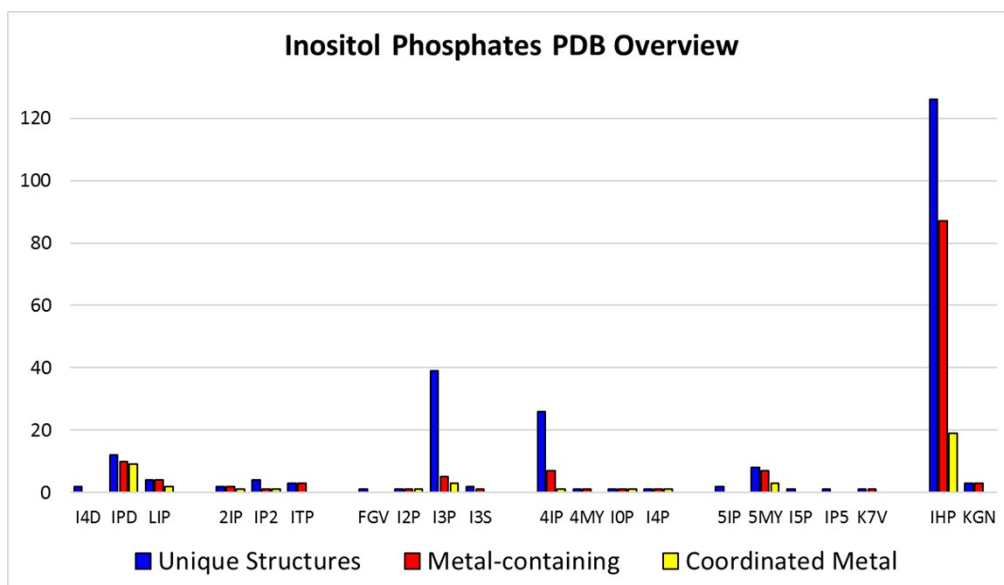

**Fig. S6.** Unique PDB structures containing inositol-phosphates (1-6 phosphate groups). Gaps separate isomers with different number of phosphate groups. Nomenclature follows PDB standard (cf. Table S4).

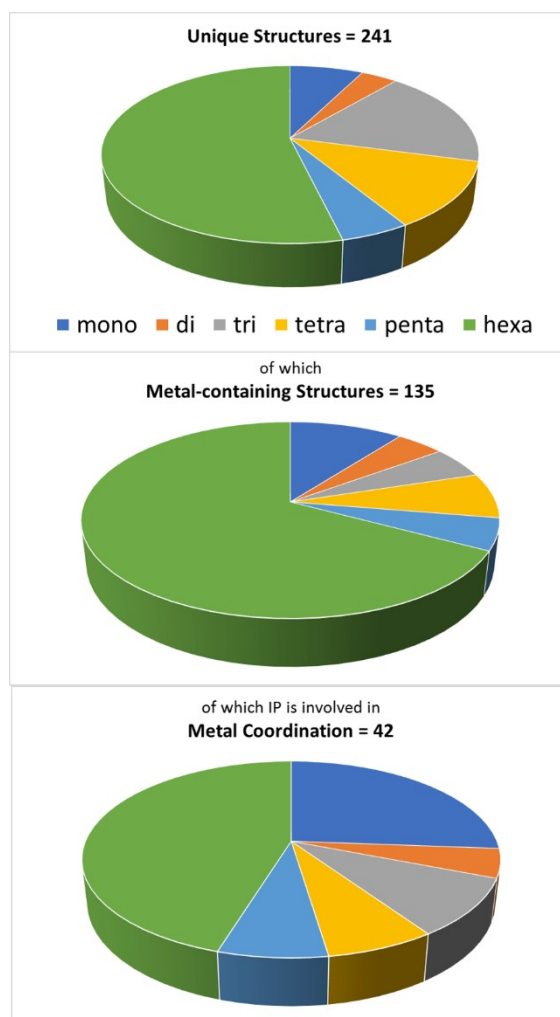

**Fig. S7.** Distribution of available literature material by number of phosphate substituents (1-6) on the inositol core.

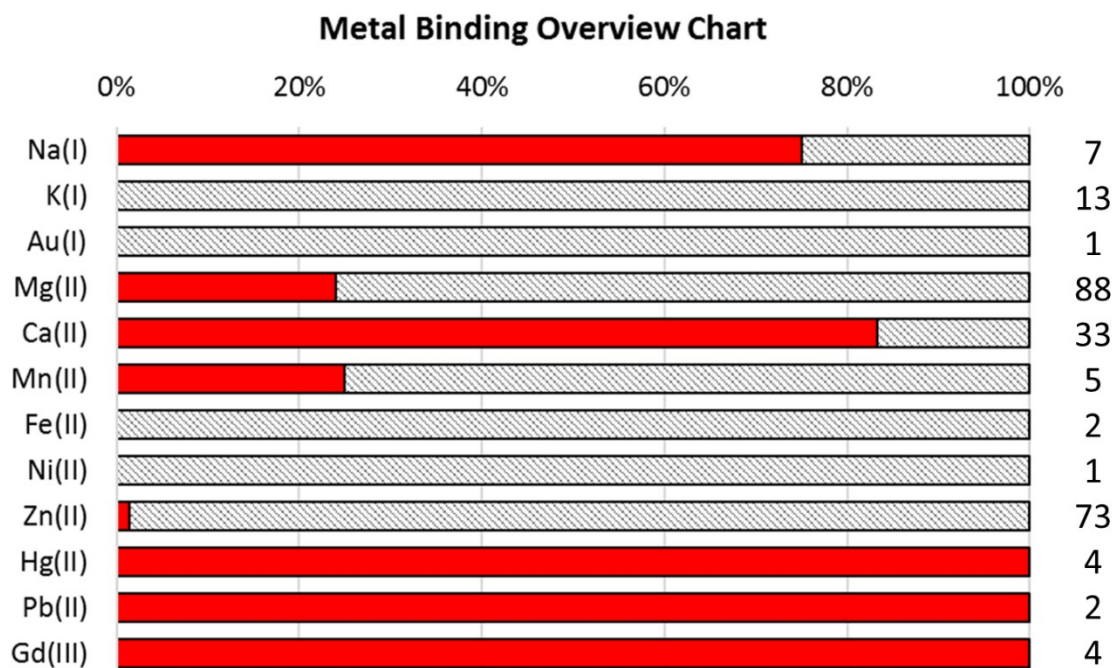

**Fig. S8.** Experimental metal by metal binding chance as percent of coordinated vs structure containing both the metal ion and *InsPs*. Metal ions are sorted by charge, then by atomic number. Figures on the right are the number of PDB structures containing *InsPs* and the specified metal cation.

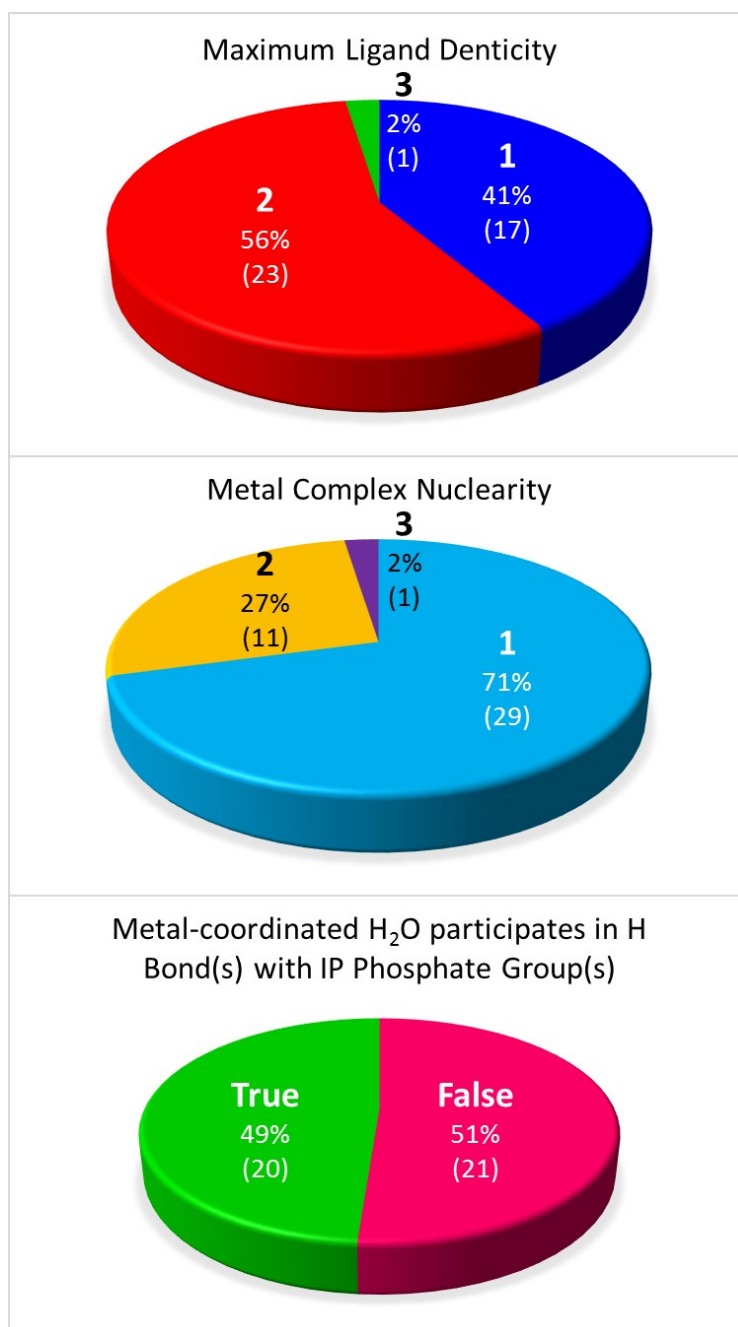

Fig. S9. Overlook on metal complexes features: ligand denticity, metal complex nuclearity (as number of metal cations directly bound to each *InsP*), participations of metal-coordinated water molecules in H-bond with phosphate groups of the ligand.
